# Supplementary material for: Development and Evaluation of Glycine max Germplasm Lines with Quantitative Resistance to Sclerotinia sclerotiorum
Source: PubMed Central journal article supplement (PMC5584390; doi:10.3389/fpls.2017.01495), 2017-08-31
Supplement: Table_1.pdf [file Table_1.pdf]

**Supplementary Table S1.** Mean lodging scores for breeding lines in 2014

| Variety   | Mean Lodging Score <sup>z</sup> | Rank Estimate <sup>y</sup> |
|-----------|---------------------------------|----------------------------|
| 91-145    | 3.4                             | 62.4 a                     |
| 51-23     | 3.0                             | 56.0 ab                    |
| 91-103    | 3.0                             | 56.0 ab                    |
| SSR51-70  | 3.0                             | 53.8 abc                   |
| W04-1002  | 3.0                             | 51.6 abcd                  |
| SSR81-62  | 2.8                             | 50.6 abc                   |
| 41-39     | 2.6                             | 45.2 bcd                   |
| 52-14     | 2.2                             | 35.6 cdef                  |
| SSR81-107 | 2.2                             | 34.4 de                    |
| 91-44     | 2.0                             | 29.0 e                     |
| 52-82B    | 1.6                             | 20.6 ef                    |
| Dwight    | 1.6                             | 20.6 ef                    |
| 52-11     | 1.5                             | 18.5 efg                   |
| 91-38     | 1.4                             | 16.4 fg                    |
| AxN-1-55  | 1.0                             | 8.0 g                      |

<sup>z</sup>Soybean lodging was scored on a 1-5 scale: 1= upright. 2 = 25-degree lean. 3 = 45-degree lean. 4 = more than 45-degree lean and 5 = laying on the ground. This scale represents the approximate average rating for the whole plot.

<sup>y</sup>Rank estimates were generated to compare categorical lodging scores. Values followed by the same letter are not significantly different based on Fisher's Least Significant Difference (LSD;  $\alpha=0.05$ ).
