# Supplementary material for: Development and Evaluation of Glycine max Germplasm Lines with Quantitative Resistance to Sclerotinia sclerotiorum
Source: PubMed Central journal article supplement (PMC5584390; doi:10.3389/fpls.2017.01495), 2017-08-31
Supplement: Table_2.pdf [file Table_2.pdf]

**Supplementary Table S2.** Mean lodging scores for breeding lines in 2016

| Variety  | Mean Lodging Score <sup>a</sup> | Rank Estimate <sup>b</sup> |
|----------|---------------------------------|----------------------------|
| 91-145   | 3.4                             | 48.3 a                     |
| SSR51-70 | 3.2                             | 46.2 a                     |
| 91-44    | 2.4                             | 36.5 ab                    |
| W04-1002 | 2.0                             | 29.4 bc                    |
| 51-23    | 2.0                             | 33.0 b                     |
| Dwight   | 1.6                             | 26.8 bc                    |
| 52-82B   | 1.3                             | 21.3 bcd                   |
| 52-11    | 1.2                             | 17.9 cd                    |
| AxN-1-55 | 1.0                             | 14.5 d                     |
| 91-38    | 1.0                             | 14.5 d                     |

<sup>a</sup>Soybean lodging was scored on a 1-5 scale: 1= upright. 2 = 25-degree lean. 3 = 45-degree lean. 4 = more than 45-degree lean and 5 = laying on the ground. This scale represents the approximate average rating for the whole plot.

<sup>b</sup>Rank estimates were generated to compare categorical lodging scores. Values followed by the same letter are not significantly different based on Fisher's Least Significant Difference (LSD;  $\alpha=0.05$ ).
