# Supplementary material for: Development and Evaluation of Glycine max Germplasm Lines with Quantitative Resistance to Sclerotinia sclerotiorum
Source: PubMed Central journal article supplement (PMC5584390; doi:10.3389/fpls.2017.01495), 2017-08-31
Supplement: Table_3.pdf [file Table_3.pdf]

**Supplementary Table S3.** Total protein and total oil content of grain from soybean breeding lines harvested in 2015 calibrated to 13% moisture

| Breeding Line | Protein (%) <sup>z</sup> | Oil (%) <sup>z</sup> |
|---------------|--------------------------|----------------------|
| 91-103        | 38.4 a                   | 18.2 h               |
| W04-1002      | 38.1 ab                  | 17.8 i               |
| 91-38         | 37.8 abc                 | 19.0 bc              |
| SSR51-70      | 37.5 bd                  | 18.6 df              |
| 52-14         | 37.3 cde                 | 18.7 cde             |
| 91-44         | 37.1 de                  | 19.6 a               |
| 52-11         | 37.1 de                  | 18.5 efgh            |
| 91-145        | 37.1 de                  | 18.2 gh              |
| 52-82B        | 37.0 df                  | 18.5 dg              |
| AxN-1-55      | 37.0 df                  | 18.4 efgh            |
| SSR81-62      | 36.8 ef                  | 18.2 h               |
| SSR81-107     | 36.4 fg                  | 19.2 b               |
| Dwight        | 35.7 gh                  | 18.8 cd              |
| 51-23         | 35.5 h                   | 18.3 fgh             |
| 41-39         | 35.3 h                   | 19.3 ab              |

<sup>z</sup>Means followed by the same letter are not significantly different based on Fisher's Least Significant Difference (LSD;  $\alpha=0.05$ ).
