# Supplementary material for: Development and Evaluation of Glycine max Germplasm Lines with Quantitative Resistance to Sclerotinia sclerotiorum
Source: PubMed Central journal article supplement (PMC5584390; doi:10.3389/fpls.2017.01495), 2017-08-31
Supplement: Table_4.pdf [file Table_4.pdf]

**Supplementary Table S4.** Total protein and total oil content of grain from soybean breeding lines harvested in 2016 calibrated to 13% moisture.

| Breeding Line | Protein (%) <sup>a</sup> | Oil (%) <sup>a</sup> |
|---------------|--------------------------|----------------------|
| W04-1002      | 39.4 a                   | 17.9 c               |
| SSR51-70      | 39.2 ab                  | 18.6 b               |
| 91-44         | 38.7 ac                  | 19.2 a               |
| 91-38         | 38.6 bc                  | 19.2 a               |
| 52-82B        | 38.5 bc                  | 18.1 c               |
| 52-11         | 38.5 c                   | 18.4 b               |
| AxN-1-55      | 38.3 c                   | 18.4 b               |
| 91-145        | 37.6 d                   | 18.7 b               |
| Dwight        | 37.6 d                   | 18.5 b               |
| 51-23         | 37.3 d                   | 18.5 b               |

<sup>a</sup>Means followed by the same letter are not significantly different based on Fisher's Least Significant Difference (LSD;  $\alpha=0.05$ ).
